# Supplementary material for: Comparative Metabolite Profiling of Wild and Cultivated Justicia procumbens L. Based on 1H-NMR Spectroscopy and HPLC-DAD Analysis
Source: MDPI journal article supplement (doi:10.3390/plants9070860), 2020-07-07
Supplement: s1 [file s1]

# Supplementary Materials

## Method validation

HPLC method was used for determination of the content of marker compound (Justicidin B) in *Justicia procumbens*. To demonstrate the method's suitability for its intended purpose, the method was validated by parameters such as specificity, linearity, precision, accuracy, limit of quantification (LOQ), limit of detection (LOD), and system suitability.

### *Specificity and system suitability*

Specificity was evaluated by identifying any interferences in retention time of justicidin B from the blank and sample solution. System suitability was evaluated by determining the relative standard deviation (RSD) of measured peak areas in six repeat injections of the standard solution (50 µg/mL).

No interferences in retention time of justicidin B from the blank and sample solution was observed. The retention time of justicidin B was confirmed to be 47.3 min. System suitability was deemed good, with 0.97% RSD for the justicidin B peak area.

### *Linearity and range*

Linearity was evaluated by the coefficient of determination ( $R^2$ ) of the calibration curve. To construct the calibration curve, a stock solution of justicidin B standard was prepared at 1000 µg/mL with N,N-dimethyl sulfoxide (50 mg/g per sample); this solution was then diluted to eight different concentrations (0.125–5 mg/g) with anhydrous ethanol. The calibration curve solution was prepared in triplicate for each concentration. The calibration curves were constructed by plotting peak areas vs. concentration of each calibration curve solution.

As shown in Table S2, the linear regression equation was  $y = 2140.0x + 57.7$  and the calibration curve was good in the range 0.125–5 mg/g ( $R^2 = 0.9999$ ), thus confirming the linearity of justicidin B.

### *LOD and LOQ*

Based on the calibration curves, the LOD and LOQ were estimated from the standard deviation of the response and the slope. They were estimated as  $3.3 \sigma/S$  and  $10 \sigma/S$ , respectively, where  $\sigma$  is the standard deviation of y-intercepts of the regression equation and  $S$  is the slope. The LOQ was verified by evaluating the signal-to-noise (S/N) ratio and recovery of six samples prepared at the LOQ concentration.

The LOD and LOQ calculated from the linear regression equation were 0.017 mg/g and 0.051 mg/g, respectively. The S/N ratio of LOQ was 49.2 and recovery was 102.5% (2.04% RSD,  $n = 6$ ). Thus, the LOQ was verified (Table S2).

### *Precision and accuracy*

Repeatability (intra-day) and intermediate precision (inter-day) were evaluated by determining the RSD of the measured amount of justicidin B in six sample solutions for three days. The effect of random events was confirmed by changing days, analysts, HPLC systems, and columns. Accuracy was

evaluated by determining the recovery of samples spiked with three different concentrations of justicidin B (10, 30, and 50 µg/mL) in sample solution.

Repeatability and intermediate precision were good, as indicated by 0.84~1.88% intra-day RSD and 1.41% inter-day RSD, respectively (Table S3). Recovery was also good (100.5%, 2.80% RSD) (Table 3). Thus, precision and accuracy were confirmed.

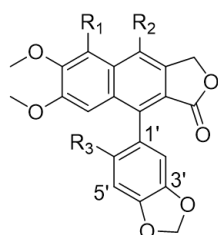

- 1  $R_1 = H, R_2 = O\text{-}[\beta\text{-D-xylopyranosyl-(1'''\rightarrow 2'')}\text{-}\beta\text{-D-xylopyranosyl-(1''''\rightarrow 5'')}\text{-}\beta\text{-D-apiofuranosyl}], R_3 = H$
- 2  $R_1 = H, R_2 = O\text{-}[\beta\text{-D-apiofuranosyl-(1''''\rightarrow 3'')}\text{-}\alpha\text{-L-arabinopyranosyl-(1'''\rightarrow 2'')}\text{-}[\beta\text{-D-xylopyranosyl-(1'''\rightarrow 5'')}\text{-}\beta\text{-D-apiofuranosyl}], R_3 = H$
- 3  $R_1 = H, R_2 = OCH_3, R_3 = O\text{-}\beta\text{-D-glucopyranosyl}$
- 4  $R_1 = H, R_2 = O\text{-}\beta\text{-D-apiofuranosyl}, R_3 = H$
- 5  $R_1 = H, R_2 = H, R_3 = OH$
- 6  $R_1 = H, R_2 = OH, R_3 = H$
- 8  $R_1 = H, R_2 = H, R_3 = H$
- 9  $R_1 = H, R_2 = OCH_3, R_3 = H$
- 11  $R_1 = OCH_3, R_2 = H, R_3 = H$

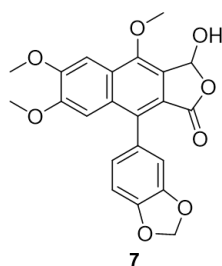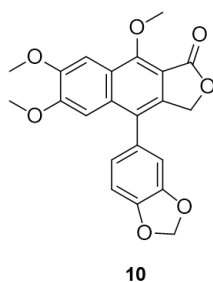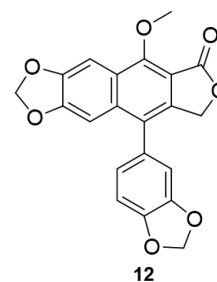

**Figure S1.** Structure of compounds (1–12) isolated from *Justicia procumbens*.

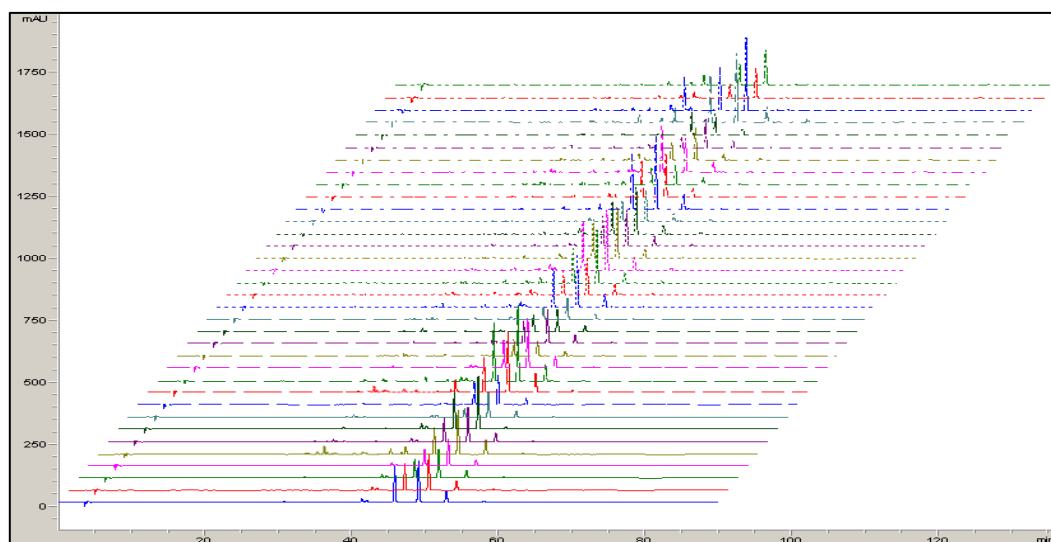

**Figure S2.** HPLC chromatogram of *J. procumbens* (n = 35).

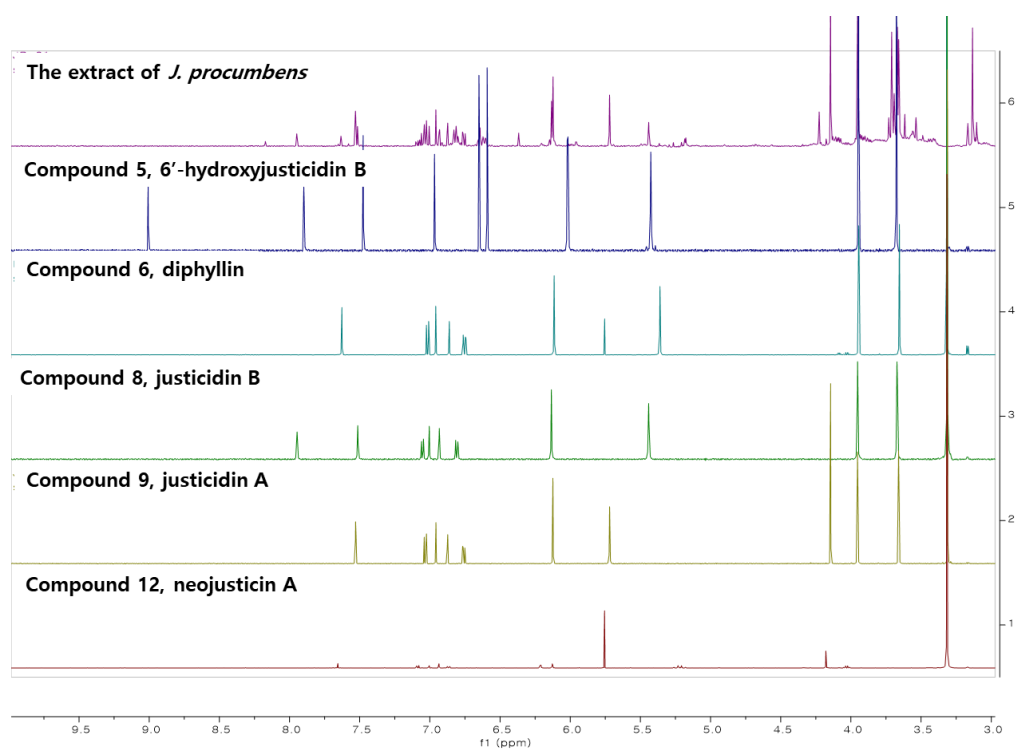

**Figure S3.** Stacked <sup>1</sup>H-NMR spectra of reference compounds and *J. procumbens* extract.

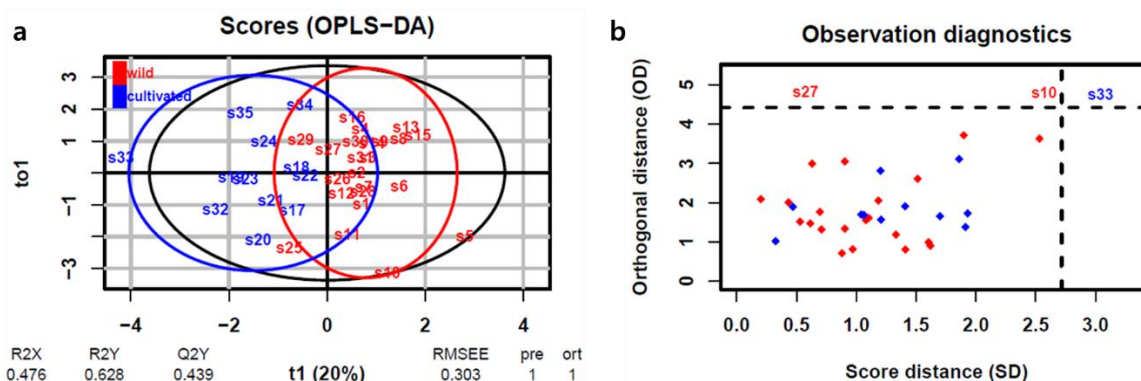

**Figure S4.** OPLS-DA model of the collection type response in *J. procumbens* (n = 35). Blue: cultivated plants (n = 12); red: wild plants (n = 23). (a) x-score plot showing the number of components and cumulative R<sup>2</sup>X, R<sup>2</sup>Y, and Q<sup>2</sup>Y values (n = 35); (b) Outlier diagnostics of samples.

**Table S1.** Chromatographic, UV, and mass spectrometry (MS) data of peaks 1~11 analyzed by HPLC-DAD.

| Peak no. | t <sub>R</sub><br>(min) | Compound name                                                         | λ <sub>max</sub> (nm)   | MS                                                                             |
|----------|-------------------------|-----------------------------------------------------------------------|-------------------------|--------------------------------------------------------------------------------|
| 1        | 30.7                    | azizin                                                                | 201, 228, 262, 315      | 645.2 [M+H] <sup>+</sup>                                                       |
| 2        | 31.2                    | ciliatoside B                                                         | 201, 228, 262, 315      | 931.2 [M+Na] <sup>+</sup>                                                      |
| 3        | 32.3                    | justicidin A                                                          | 201, 222, 262, 315      | 595.2 [M+Na] <sup>+</sup>                                                      |
| 4        | 34.8                    | tuberculatins                                                         | 201, 229, 262           | 513.2 [M+H] <sup>+</sup>                                                       |
| 5        | 36.5                    | 6'-hydroxyjusticidin B                                                | 201, 222, 258, 310      | 381.1 [M+H] <sup>+</sup>                                                       |
| 6        | 41.3                    | diphyllins                                                            | 201, 231, 268           | 381.1 [M+H] <sup>+</sup>                                                       |
| 7        | 41.9                    | 2a-hydroxyjusticidin A                                                | 201, 262                | 411.1 [M+H] <sup>+</sup>                                                       |
| 8        | 45.8                    | justicidin B                                                          | 201, 223, 258, 296, 310 | 365.1 [M+H] <sup>+</sup>                                                       |
| 9        | 49.0                    | justicidin A                                                          | 201, 234, 262, 310      | 395.1 [M+H] <sup>+</sup>                                                       |
| 10       | 52.8                    | overlap of justicidin C <sup>a</sup> and phyllamyricin C <sup>b</sup> | 201, 262, 318           | <sup>a</sup> 395.1 [M+H] <sup>+</sup><br><sup>b</sup> 395.1 [M+H] <sup>+</sup> |
| 11       | 57.8                    | neojusticidin A                                                       | 201, 262, 318           | 379.1 [M+H] <sup>+</sup>                                                       |

t<sub>R</sub>: retention time.

**Table S2.** Calculated parameters for the calibration curve (n = 3).

| Compound     | Regression equation | R <sup>2</sup> | Range (mg/g) | LOD (μg/g) | LOQ (μg/g) |
|--------------|---------------------|----------------|--------------|------------|------------|
| justicidin B | Y = 2140.0 x + 57.7 | 0.9999         | 0.125~5      | 0.017      | 0.051      |

Equation: y = peak area, x = concentration of standard (mg/g); LOD: limit of detection; LOQ: limit of quantification; R<sup>2</sup>: coefficient of determination.

**Table S3.** Repeatability (intra-day, n = 6) and intermediate precision (inter-day, n = 3) of justicidin B.

| Sample no. | Intra-day |         | Inter-day |         |
|------------|-----------|---------|-----------|---------|
|            | Mean ± SD | RSD (%) | Mean ± SD | RSD (%) |

|     |             |      |             |      |
|-----|-------------|------|-------------|------|
|     | 1.22 ± 0.01 | 0.84 |             |      |
| S20 | 1.20 ± 0.02 | 1.88 | 1.21 ± 0.02 | 1.41 |
|     | 1.21 ± 0.01 | 1.00 |             |      |

RSD: relative standard deviation; SD: standard deviation.

**Table S4.** Recovery of justicidin B.

| Recovery sample<br>(Conc.) | Q1*   | Q2**  | Q3 (n = 3)*** | Recovery<br>(%) | Total rec.<br>(%) | RSD<br>(%) |
|----------------------------|-------|-------|---------------|-----------------|-------------------|------------|
| justicidin B (10<br>μg/mL) | 23.72 | 9.86  | 33.96 ± 0.06  | 103.9 ±<br>0.73 |                   |            |
| justicidin B (30<br>μg/mL) | 23.72 | 29.57 | 53.16 ± 0.42  | 99.6 ± 1.74     | 100.5 ±<br>2.81   | 2.80       |
| justicidin B (50<br>μg/mL) | 23.72 | 49.28 | 71.99 ± 0.05  | 98.0 ± 0.12     |                   |            |

\*Q1: quantity of justicidin B (μg/mL) in unspiked sample solution (S20); \*\*Q2: quantity of spiking standard solution (μg/mL, “added”); \*\*\*Q3: quantity of justicidin B (μg/mL) in spiked sample solution; RSD: relative standard deviation.

**Table S5.** Samples used in this study.

| No. | Collection site                                         | Collection date | Collection<br>type |
|-----|---------------------------------------------------------|-----------------|--------------------|
| S1  | Yeongdeok-dong, Giheung-gu, Yongin-si, Gyeonggi-do      | 2012.10         | Wild               |
| S2  | Sampyeong-dong, Bundang-gu, Seongnam-si,<br>Gyeonggi-do | 2013.8          | Wild               |
| S3  | Jayang-dong, Dong-gu, Daejeon                           | 2013.9          | Wild               |
| S4  | Yeongdeok-dong, Giheung-gu, Yongin-si, Gyeonggi-do      | 2013.9          | Wild               |
| S5  | Ha-dong, Yeongtong-gu, Suwon-si, Gyeonggi-do            | 2013.10         | Wild               |
| S6  | Makgye-dong, Gwacheon-si, Gyeonggi-do                   | 2013.10         | Wild               |
| S7  | Idong-eup, Cheoin-gu, Yongin-si, Gyeonggi-do            | 2013.10         | Wild               |
| S8  | Myeonmok-dong, Jungnang-gu, Seoul                       | 2013.10         | Wild               |
| S9  | Ha-dong, Yeongtong-gu, Suwon-si, Gyeonggi-do            | 2013.10         | Wild               |
| S10 | Yeongdeok-dong, Giheung-gu, Yongin-si, Gyeonggi-do      | 2013.10         | Wild               |
| S11 | Bora-dong, Giheung-gu, Yongin-si, Gyeonggi-do           | 2013.10         | Wild               |
| S12 | Gongse-dong, Giheung-gu, Yongin-si, Gyeonggi-do         | 2013.10         | Wild               |
| S13 | Gongse-dong, Giheung-gu, Yongin-si, Gyeonggi-do         | 2013.10         | Wild               |
| S14 | Gongse-dong, Giheung-gu, Yongin-si, Gyeonggi-do         | 2013.11         | Wild               |
| S15 | Jigok-dong, Giheung-gu, Yongin-si, Gyeonggi-do          | 2013.11         | Wild               |
| S16 | Sajeong-dong, Jung-gu, Daejeon                          | 2013.11         | Wild               |
| S17 | Gongse-dong, Giheung-gu, Yongin-si, Gyeonggi-do         | 2014.9          | Cultivation        |

|     |                                                                                |         |             |
|-----|--------------------------------------------------------------------------------|---------|-------------|
| S18 | Gongse-dong, Giheung-gu, Yongin-si, Gyeonggi-do                                | 2015.9  | Cultivation |
| S19 | Korea National Arboretum, Damun-ri, Yongmun-myeon, Yangpyeong-gun, Gyeonggi-do | 2015.9  | Cultivation |
| S20 | Gangje-dong, Jecheon-si, Chungcheongbuk-do                                     | 2015.9  | Cultivation |
| S21 | Korea National Arboretum, Damun-ri, Yongmun-myeon, Yangpyeong-gun, Gyeonggi-do | 2016.9  | Cultivation |
| S22 | Gangje-dong, Jecheon-si, Chungcheongbuk-do                                     | 2016.9  | Cultivation |
| S23 | Dohwa-ro, Songhak-myeon, Jecheon-si, Chungcheongbuk-do                         | 2017.9  | Cultivation |
| S24 | Dohwa-ro, Songhak-myeon, Jecheon-si, Chungcheongbuk-do                         | 2018.9  | Cultivation |
| S25 | Songhak-myeon, Jecheon-si, Chungcheongbuk-do                                   | 2018.11 | Wild        |
| S26 | Dongnam-ro, Yangnam-myeon, Gyeongju-si, Gyeongsangbuk-do                       | 2014.10 | Wild        |
| S27 | Banpo-daero, Seocho-gu, Seoul                                                  | 2014.10 | Wild        |
| S28 | Makgye-dong, Gwacheon-si, Gyeonggi-do                                          | 2014.10 | Wild        |
| S29 | Gyo-dong, Wansan-gu, Jeonju-si, Jeollabuk-do                                   | 2015.8  | Wild        |
| S30 | Gung-dong, Yuseong-gu, Daejeon                                                 | 2017.9  | Wild        |
| S31 | Inpung-ri, Jeongan-myeon, Gongju-si, Chungcheongnam-do                         | 2017.10 | Wild        |
| S32 | Gangje-dong, Jecheon-si, Chungcheongbuk-do                                     | 2019.9  | Cultivation |
| S33 | Hangok-ri, Yongsan-myeon, Yeongdong-gun, Chungcheongbuk-do                     | 2017.10 | Cultivation |
| S34 | Hangok-ri, Yongsan-myeon, Yeongdong-gun, Chungcheongbuk-do                     | 2018.10 | Cultivation |
| S35 | Hangok-ri, Yongsan-myeon, Yeongdong-gun, Chungcheongbuk-do                     | 2019.10 | Cultivation |

---
